# Supplementary material
Source: publisher site journal article supplement (https://www.dovepress.com/article/408674)
Supplement: Supplementary file 1 [file get_supplementary_file.php]

**Supplementary Materials**

**Table S1:** Characteristics of revision bronchoscopies and valve replacements

| **Localization of revision bronchoscopy** | | **n** | **n and percentage** | | |
| --- | --- | --- | --- | --- | --- |
|  | Right upper lobe | 218 | 17 |  | 7.8 | |
|  | Right upper lobe and middle lobe | 218 | 2 |  | 0.9 | |
|  | Middle lobe | 218 | 0 |  | 0 | |
|  | Right lower lobe | 218 | 31 |  | 14.2 | |
|  | Left upper lobe | 218 | 21 |  | 9.6 | |
|  | Left lower lobe | 218 | 147 |  | 67.4 | |
| **Action taken in revision bronchoscopy** | |  |  |  |  | |
|  | Replacement (explantation and implantation) | 217 | 60 |  | 27.6 | |
|  | Only explantation | 217 | 51 |  | 23.5 | |
|  | Only implantation | 217 | 67 |  | 30.9 | |
|  | No intervention | 217 | 26 |  | 12 | |
|  | Other intervention (e.g. removing secretion) | 217 | 13 |  | 6 | |
| **Action taken for valve replacement** | |  |  |  |  | |
|  | Change of valve type (EBV to IBV or IBV to EBV*) | 185 | 52 |  | 28,1 | |
|  | Change of valve size | 185 | 26 |  | 14.1 | |
|  | Same valve re-implanted | 185 | 60 |  | 32.4 | |
|  | Change in number of valves | 185 | 45 |  | 23.3 | |

* EBV= endobronchial valves, IBV = intrabronchial valves

**Table S2.** Course of lung function, exercise capacity and questionnaire scores at all follow-up timepoints for the group with complete lobar atelectasis (n=19)

|  | **Baseline** | **90-day FU** | **p-value** | **180-day FU** | **p-value** | **365-day FU** | **p-value** | **30 days after last valve replacement** | **p-value** | **180days after last valve replacement** | **p-value** |
| --- | --- | --- | --- | --- | --- | --- | --- | --- | --- | --- | --- |
| **FEV1 (l)** | 0.9±0.3 (n=19) | 1±0.4 (n=14) | 0.132 | 1±0.3 (n=9) | 0.384 | 0.9±0.3 (n=8) | 0.378 | 1±0.3 (n=19) | 0.344 | 0.9±0.4 (n=18) | 0.551 |
| **FEV1 (%)** | 32.3±9.1 (n=19) | 36.3±12.7 (n=14) | 0.051 | 38.2±14.2 (n=9) | 0.270 | 31.1±11.6 (n=8) | 0.294 | 35.3±13 (n=19) | 0.204 | 34.5±14.2 (n=18) | 0.269 |
| **RV (l)** | 5.5±1.7 (n=19) | 4.9±1.5 (n=14) | 0.007***** | 5±1.6 (n=9) | 0.359 | 5.6±1.8 (n=8) | 0.347 | 5±1.9 (n=19) | 0.017***** | 4.9±1.6 (n=18) | 0.038***** |
| **RV (%)** | 242.9±54.8 (n=19) | 215.4±52.4  (n=14) | 0.009***** | 218.1±50.7  (n=9) | 0.296 | 234.8±52.3  (n=8) | 0.229 | 219.2±64.7 (n=19) | 0.011***** | 216.2±59.9 (n=18) | 0.023***** |
| **VC (l)** | 2.5±0.7 (n=19) | 2.7±0.8 (n=14) | 0.201 | 2.7±0.7 (n=9) | 0.613 | 2.6±0.6 (n=8) | 0.220 | 2.5±0.8 (n=19) | 0.651 | 2.5±0.8 (n=18) | 0.609 |
| **VC (%)** | 71.5±17.4 (n=19) | 76.7±21.6 (n=14) | 0.160 | 77.5±24.3 (n=9) | 0.779 | 69.3±20.8 (n=8) | 0.221 | 71.3±22.3  (n=19) | 0.944 | 72±21.9 (n=18) | 0.975 |
| **TLC (l)** | 8±1.9 (n=19) | 7.5±1.5 (n=14) | 0.019***** | 7.8±1.5 (n=9) | 0.171 | 8.5±1.7 (n=7) | 0.018***** | 7.5±1.8  (n=19) | <0.001***** | 7.3±1.8 (n=18) | 0.002***** |
| **TLC (%)** | 132.7±15.3 (n=19) | 125.3±12.5 (n=14) | 0.019***** | 128.2±13.2 (n=9) | 0.131 | 125.8±10.6 (n=8) | 0.026***** | 128.2±19.9 (n=19) | 0.302 | 122.6±13.8 (n=18) | 0.003***** |
| **DLCO SB** | 32.8±10.5 (n=19) | 30.5±11.2 (n=14) | 0.574 | 31.7±11.6 (n=9) | 0.671 | 33.8±8 (n=6) | 0.645 | 32.4±12 (n=15) | 0.506 | 36.6±9.2 (n=13) | 0.666 |
| **DLCO/VA** | 46.5±12.5 (n=19) | 45.5±13.8 (n=14) | 0.350 | 43.5±14.9 (n=9) | 0.924 | 52.6±16.8 (n=6) | 0.311 | 45.1±14.8 (n=15) | 0.497 | 54.8±15.8 (n=13) | 0.221 |
| **6-MWD** | 284±100 (n=18) | 322±109 (n=10) | 0.417 | 369±57 (n=5) | 0.175 | 404±58 (n=5) | 0.297 | 327±6 (n=12) | 0.150 | 362±49 (n=10) | 0.054 |
| **mMRC** | 3±1 (n=19) | 3±2 (n=13) | n.a. | 3±2 (n=6) | n.a. | 3±1 (n=7) | n.a. | 3±1 (n=18) | n.a. | 3±1 (n=18) | n.a. |
| **CAT** | 27±5 (n=8) | 26±6 (n=7) | n.a. | 22±8 (n=4) | n.a. | 20±5 (n=4) | n.a. | 22±8 (n=12) | n.a. | 24±7 (n=12) | n.a. |

*****significant improvements in comparison to baseline (*p* < 0.05)
n.a. = not available
